# Supplementary material for: Piscidin is Highly Active against Carbapenem-Resistant Acinetobacter baumannii and NDM-1-Producing Klebsiella pneumonia in a Systemic Septicaemia Infection Mouse Model
Source: PubMed Central journal article supplement (PMC4413212; doi:10.3390/md13042287), 2015-04-14
Supplement: marinedrugs-13-02287-s001.pdf [file marinedrugs-13-02287-s001.pdf]

# Supplementary Information

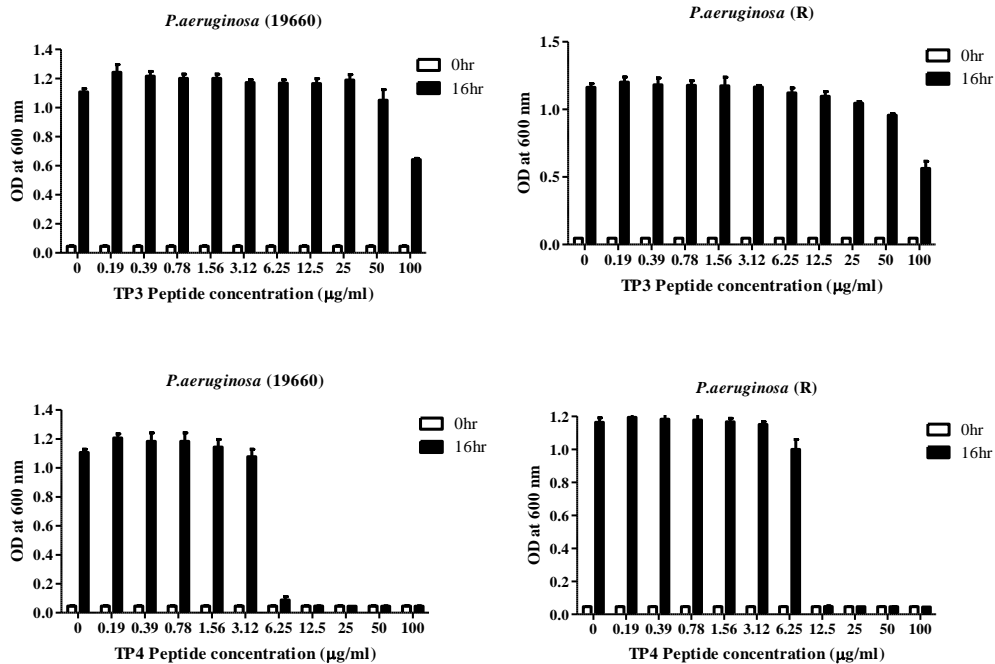

**Figure S1.** Dose-dependent growth inhibition of *Pseudomonas aeruginosa* (ATCC19660) or drug-resistant *Pseudomonas aeruginosa* (R) by incubation with TP3 or TP4 for 16 h. The data are expressed as means of three replicates. Error bars represent the standard derivation (SD). OD, optical density.

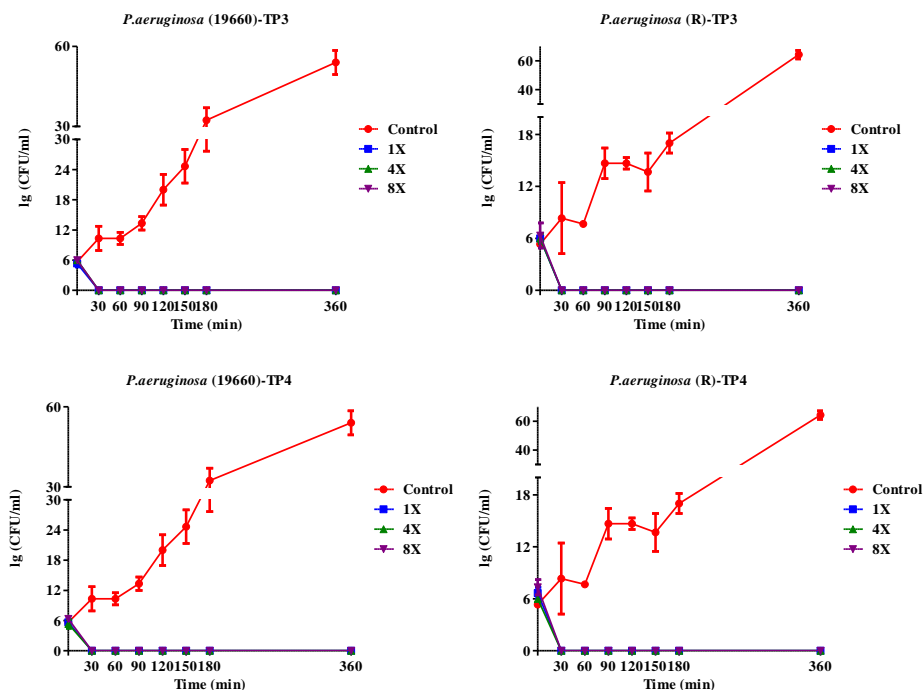

**Figure S2.** Kill kinetics of TP3 and TP4 against *Pseudomonas aeruginosa* (ATCC19660) and drug-resistant *Pseudomonas aeruginosa* (R). Controls were not treated with peptide. The peptide concentrations were 1 × MIC (1 ×), 4 × MIC (4 ×), or 8 × MIC (8 ×). Experiments were performed in triplicate and the bactericidal activities are presented as mean lg (CFU/mL). Error bars represent the standard deviations.

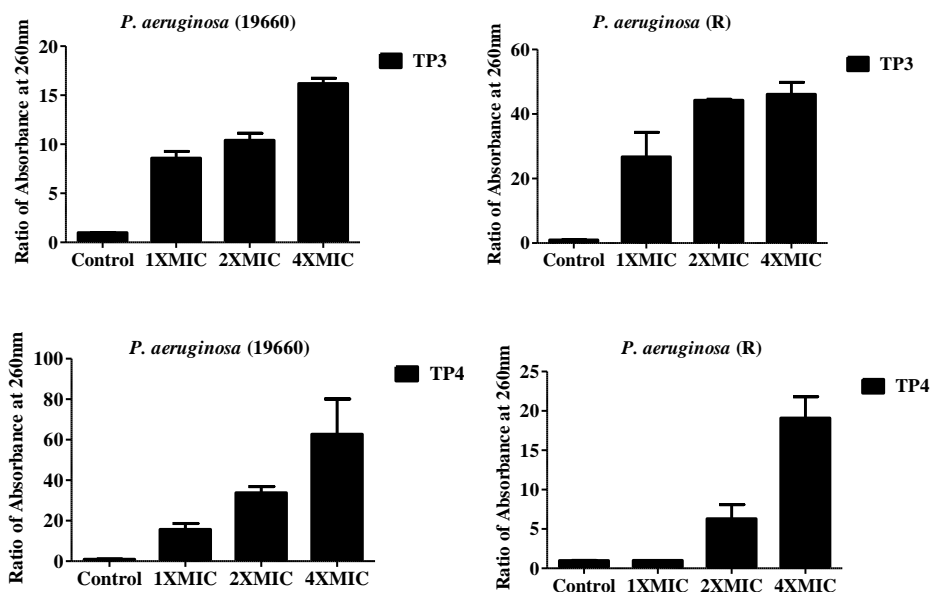

**Figure S3.** The effect of TP3 and TP4 on the release of DNA from *Pseudomonas aeruginosa* (ATCC19660) or drug-resistant *Pseudomonas aeruginosa* (R). Peptide concentrations used were 1 × MIC, 2 × MIC, or 4 × MIC. “Control” indicates untreated cells. The data are means of at least three independent experiments. Error bars represent the standard deviations.

**Table S1.** Phenotypes, genotypes, and drug resistant features of clinical bacteria isolates provided by Te-Li Chen (Taipei Veterans General Hospital) for use in this study.

| Bacterial strain             | Information                    |
|------------------------------|--------------------------------|
| <i>K. pneumoniae</i> (YT 32) | Phenotype: blaAmpC (+)         |
|                              | Genotype: blaAmpC (+) ESBL (+) |
| <i>E. coli</i> (YT 39)       | Phenotype: blaAmpC (+)         |
|                              | Genotype: blaAmpC (+)          |
| <i>E. coli</i> (YT 154)      | Phenotype: blaAmpC (+)         |
|                              | Genotype: blaAmpC (+) ESBL (+) |
